# Supplementary material
Source: publisher site journal article supplement (https://www.spandidos-publications.com/5128/downloadSupplementary)

Figure S1. The safety and tolerability of the combination of CPT and sorafenib. (A), represents the mouse body weights of the group CTR, CPT, SOR, COM after the treatment. (B), represents the rabbit body weights of the four groups after the treatment. (C-G), represents the AST, ALT, BUN, Cr, TBIL based on the mice serum analysis of the four groups after the treatment. CTR, control; CPT, camptothecin; SOR, sorafenib; COM, combined; AST, aspartate aminotransferase; ALT, alanine aminotransferase; TBIL, total bilirubin; BUN, blood urea nitrogen; Cr, creatinine.

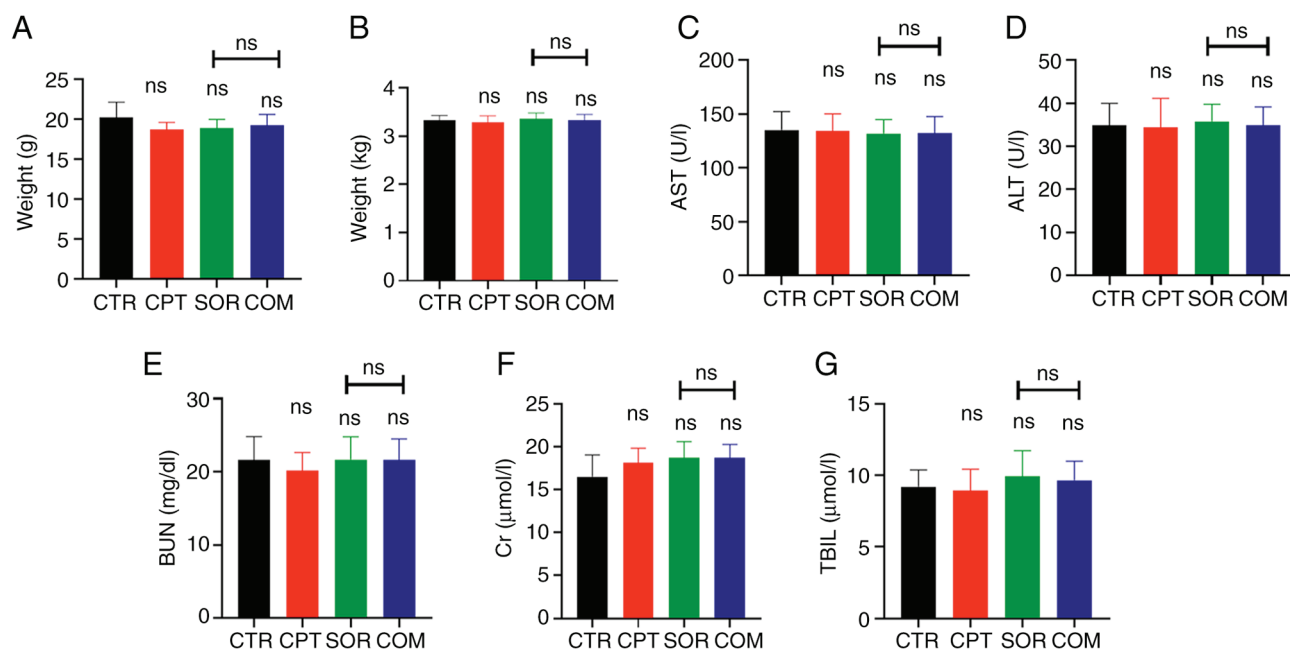

Supplement: Supplementary file 1 [file downloadSupplementary]
